# Supplementary material
Source: PubMed Central journal article supplement (PMC3615530)
Supplement: gmb-36-87-s001.pdf [file gmb-36-87-s001.pdf]

**Table S1** - The protein spots identified by MALDI-TOF-MS.

| Protein no. | Protein name                              | Accession no. | MOWSE score | NMP <sup>a</sup> | SC <sup>b</sup> | Theoretical Mr (kDa) and pI | Function <sup>c</sup> |
|-------------|-------------------------------------------|---------------|-------------|------------------|-----------------|-----------------------------|-----------------------|
| 1           | elongation factor 2                       | NP_001052057  | 222         | 27               | 39%             | 94.94/5.85                  | 8                     |
| 2           | elongation factor 2                       | NP_001046972  | 71          | 12               | 19%             | 94.99/5.85                  | 8                     |
| 3           | pullulanase                               | ACY56106      | 76          | 17               | 22%             | 103.02/5.58                 | 1                     |
| 4           | hypothetical protein OsJ_13773            | EEE60487      | 364         | 35               | 50%             | 100.41/5.58                 | 1                     |
| 5           | hypothetical protein OsJ_13773            | EEE60487      | 388         | 43               | 50%             | 100.41/5.58                 | 1                     |
| 6           | hypothetical protein OsJ_13773            | EEE60487      | 350         | 32               | 46%             | 100.41/5.58                 | 1                     |
| 7           | hypothetical protein OsJ_13773            | EEE60487      | 280         | 32               | 41%             | 100.41/5.58                 | 1                     |
| 8           | hypothetical protein OsI_19920            | EEC79204      | 236         | 25               | 36%             | 94.33/5.37                  | 5                     |
| 9           | hypothetical protein OsI_19920            | EEC79204      | 170         | 23               | 33%             | 94.33/5.37                  | 5                     |
| 10          | putative aconitate hydratase, cytoplasmic | Q6YZX6        | 214         | 23               | 35%             | 98.59/5.67                  | 1                     |
| 11          | putative aconitate hydratase, cytoplasmic | Q6YZX6        | 272         | 33               | 47%             | 98.59/5.67                  | 1                     |
| 12          | pyruvate orthophosphate dikinase          | NP_001050430  | 276         | 30               | 47%             | 87.70/5.37                  | 1                     |
| 13          | pyruvate orthophosphate dikinase          | NP_001050430  | 116         | 16               | 23%             | 87.70/5.37                  | 1                     |
| 14          | alcohol dehydrogenase 1                   | ABA92030      | 77          | 7                | 26%             | 38.14/6.19                  | 2                     |
| 15          | hypothetical protein                      | BAD61634      | 65          | 5                | 36%             | 15.63/9.99                  | 12                    |
| 16          | glycyl-tRNA synthetase                    | NP_001062369  | 95          | 11               | 22%             | 77.65/5.95                  | 9                     |
| 17          | stress-induced-phosphoprotein 1           | NP_001047563  | 66          | 7                | 21%             | 65.16/6.03                  | 2                     |
| 18          | hypothetical protein OsJ_11969            | EEE59627      | 65          | 4                | 26%             | 13.99/4.99                  | 12                    |
| 19          | hypothetical protein                      | BAD20105      | 64          | 7                | 31%             | 30.32/11.81                 | 12                    |
| 20          | OSJNBa0039C07.11                          | CAE05155      | 88          | 14               | 26%             | 75.38/5.83                  | 3                     |
| 21          | phosphoglucomutase                        | NP_001051066  | 310         | 31               | 64%             | 63.14/5.4                   | 4                     |
| 22          | heat shock cognate 70 kDa protein         | ABF95267      | 247         | 28               | 47%             | 71.93/5.3                   | 2                     |
| 23          | heat shock cognate 70 kDa protein         | ABF95267      | 150         | 23               | 52%             | 71.93/5.3                   | 2                     |
| 24          | endosperm lumenal binding protein         | AAB63469      | 128         | 19               | 29%             | 73.67/5.3                   | 3                     |
| 25          | endosperm lumenal binding protein         | AAB63469      | 211         | 21               | 36%             | 73.67/5.3                   | 3                     |

|    |                                                           |              |     |    |     |            |    |
|----|-----------------------------------------------------------|--------------|-----|----|-----|------------|----|
| 26 | endosperm lumenal binding protein                         | AAB63469     | 199 | 21 | 33% | 73.67/5.3  | 3  |
| 27 | hypothetical protein OsI_37938                            | EEC69073     | 184 | 19 | 37% | 76.45/5.11 | 6  |
| 28 | hypothetical protein OsI_37938                            | EEC69073     | 146 | 18 | 29% | 76.45/5.11 | 6  |
| 29 | protein disulfide-isomerase A1                            | NP_001045579 | 113 | 13 | 28% | 62.44/4.76 | 6  |
| 30 | Os10g0505900                                              | NP_001065009 | 70  | 7  | 17% | 45.55/4.74 | 2  |
| 31 | Os10g0505900                                              | NP_001065009 | 121 | 12 | 31% | 45.55/4.74 | 2  |
| 32 | Os10g0505900                                              | NP_001065009 | 170 | 18 | 42% | 45.55/4.74 | 2  |
| 33 | Os10g0505900                                              | NP_001065009 | 128 | 15 | 34% | 45.55/4.74 | 2  |
| 34 | alcohol dehydrogenase                                     | NP_001067484 | 109 | 14 | 42% | 41.70/6.2  | 1  |
| 35 | succinate dehydrogenase (ubiquinone) flavoprotein subunit | NP_001058845 | 169 | 18 | 40% | 69.49/6.61 | 4  |
| 36 | aspartyl-tRNA synthetase                                  | NP_001047770 | 165 | 17 | 35% | 61.45/5.99 | 9  |
| 37 | hypothetical protein OsJ_16432                            | EEE61811     | 166 | 16 | 40% | 57.26/5.74 | 3  |
| 38 | 2-isopropylmalate synthase B                              | ABA91408     | 174 | 19 | 40% | 68.86/6.46 | 1  |
| 39 | putative $\beta$ -N-acetylhexosaminidase                  | AAT77374     | 106 | 15 | 33% | 59.01/5.71 | 1  |
| 40 | 2-isopropylmalate synthase                                | NP_001066116 | 151 | 17 | 35% | 68.87/6.46 | 1  |
| 41 | Os03g0214000                                              | NP_001049368 | 156 | 15 | 36% | 68.72/5.88 | 5  |
| 42 | asparaginyl-tRNA synthetase                               | NP_001043066 | 199 | 23 | 40% | 62.95/5.68 | 9  |
| 43 | pyruvate decarboxylase 2                                  | AAA90948     | 204 | 17 | 37% | 65.34/5.9  | 3  |
| 44 | hypothetical protein OsJ_07413                            | EAZ23710     | 70  | 8  | 19% | 59.74/9.83 | 4  |
| 45 | pyruvate decarboxylase                                    | NP_001049811 | 210 | 17 | 40% | 65.76/5.53 | 1  |
| 46 | hypothetical protein OsI_04213                            | EEC71703     | 148 | 17 | 37% | 60.95/5.36 | 5  |
| 47 | heat shock 70kDa protein 1/8                              | NP_001044757 | 170 | 25 | 42% | 71.31/5.1  | 2  |
| 48 | putative globulin                                         | AAS07324     | 124 | 14 | 30% | 63.85/8.35 | 2  |
| 49 | Os02g0250600                                              | NP_001046445 | 64  | 9  | 22% | 47.34/6.4  | 12 |
| 50 | hypothetical protein OsI_30268                            | EAZ08004     | 118 | 17 | 34% | 64.24/6.59 | 5  |
| 51 | pyrophosphate-fructose-6-phosphate 1-phosphotransferase   | NP_001057284 | 233 | 23 | 52% | 61.91/6.01 | 1  |
| 52 | pyrophosphate-fructose-6-phosphate 2-phosphotransferase   | NP_001057284 | 238 | 24 | 55% | 61.91/6.01 | 1  |
| 53 | ketol-acid reductoisomerase                               | NP_001043738 | 103 | 10 | 31% | 59.99/5.73 | 1  |
| 54 | Chain A, ketol-acid reductoisomerase                      | 3FR7_A       | 159 | 17 | 45% | 57.57/5.46 | 3  |

|    |                                                     |              |     |    |     |            |    |
|----|-----------------------------------------------------|--------------|-----|----|-----|------------|----|
| 55 | enolase                                             | ABB46862     | 79  | 8  | 26% | 51.89/5.72 | 3  |
| 56 | UTP-glucose-1-phosphate uridylyltransferase         | NP_001063879 | 197 | 15 | 52% | 51.82/5.43 | 1  |
| 57 | Chain A, ketol-acid reductoisomerase                | 3FR7_A       | 110 | 12 | 34% | 57.57/5.46 | 3  |
| 58 | fructose-bisphosphate aldolase, class I             | NP_001045130 | 92  | 9  | 33% | 39.14/8.35 | 4  |
| 59 | chaperonin GroEL                                    | NP_001064784 | 112 | 13 | 32% | 61.10/5.71 | 3  |
| 60 | glucose-6-phosphate isomerase                       | NP_001063415 | 101 | 15 | 27% | 68.84/5.71 | 4  |
| 61 | Os06g0114000                                        | NP_001056601 | 168 | 17 | 37% | 64.33/5.6  | 3  |
| 62 | 60 kDa chaperonin $\alpha$ subunit                  | AAP44754     | 281 | 23 | 59% | 61.48/5.36 | 3  |
| 63 | 60 kDa chaperonin $\alpha$ subunit                  | AAP44754     | 75  | 23 | 27% | 61.48/5.36 | 3  |
| 64 | protein disulfide isomerase                         | BAA92322     | 76  | 10 | 34% | 33.50/4.81 | 6  |
| 65 | protein disulfide isomerase                         | BAA92322     | 197 | 17 | 59% | 33.50/4.81 | 6  |
| 66 | granule-bound starch synthase 1                     | AEB52353     | 79  | 7  | 26% | 45.35/6.14 | 4  |
| 67 | granule-bound starch synthase 1                     | AEB52353     | 185 | 19 | 59% | 45.35/6.14 | 4  |
| 68 | UDP glucose 6-dehydrogenase                         | NP_00105132  | 184 | 21 | 57% | 53.44/5.79 | 4  |
| 69 | ATP synthase F0 subunit 1                           | YP_002000594 | 234 | 26 | 57% | 55.62/5.85 | 10 |
| 70 | hypothetical protein OsI_38072                      | EAY82861     | 80  | 10 | 35% | 32.83/8.61 | 5  |
| 71 | ATP synthase F0 subunit 1                           | YP_002000594 | 207 | 24 | 49% | 55.62/5.85 | 10 |
| 72 | putative selenium binding protein                   | BAB40923     | 139 | 17 | 51% | 51.33/5.73 | 3  |
| 73 | prolyl aminopeptidase 2                             | Q6K669       | 128 | 19 | 38% | 62.18/8.29 | 6  |
| 74 | inositol-3-phosphate synthase                       | ABF94421     | 76  | 9  | 35% | 44.41/5.38 | 2  |
| 75 | glucose-1-phosphate adenylyltransferase large chain | BAD68891     | 165 | 16 | 34% | 57.74/5.48 | 1  |
| 76 | hypothetical protein OsI_10505                      | EAY89022     | 104 | 11 | 29% | 58.83/5.5  | 6  |
| 77 | glucose-6-phosphate isomerase                       | BAD08451     | 196 | 23 | 43% | 68.77/5.88 | 1  |
| 78 | alanine transaminase                                | NP_001064504 | 258 | 28 | 52% | 53.13/6.23 | 4  |
| 79 | alanine transaminase                                | NP_001064504 | 217 | 20 | 46% | 53.13/6.23 | 4  |
| 80 | glutathione reductase (NADPH)                       | NP_001048485 | 118 | 15 | 41% | 53.87/6.24 | 1  |
| 81 | putative inosine monophosphate dehydrogenase        | AAK09225     | 115 | 13 | 39% | 52.85/6.03 | 1  |
| 82 | Os03g0793700                                        | NP_001051533 | 200 | 19 | 38% | 52.44/6.78 | 2  |
| 83 | alanine transaminase                                | NP_001064504 | 112 | 12 | 30% | 53.13/6.23 | 4  |

|     |                                                            |              |     |    |     |             |    |
|-----|------------------------------------------------------------|--------------|-----|----|-----|-------------|----|
| 84  | alanine transaminase                                       | NP_001064504 | 80  | 11 | 19% | 53.13/6.23  | 4  |
| 85  | aldehyde dehydrogenase (NAD <sup>+</sup> )                 | NP_001057358 | 126 | 16 | 37% | 59.61/6.33  | 1  |
| 86  | glucose-1-phosphate adenylyltransferase                    | NP_001061603 | 86  | 9  | 28% | 53.20/5.87  | 1  |
| 87  | aldehyde dehydrogenase (NAD <sup>+</sup> )                 | NP_001057358 | 95  | 14 | 26% | 59.61/6.33  | 1  |
| 88  | glucose-1-phosphate adenylyltransferase                    | NP_001061603 | 102 | 11 | 33% | 53.20/5.87  | 1  |
| 89  | retrotransposon protein                                    | ABA92141     | 71  | 17 | 11% | 218.17/8.75 | 3  |
| 90  | wheat adenosylhomocysteinase-like protein                  | AAO72664     | 133 | 16 | 39% | 53.86/5.62  | 3  |
| 91  | hypothetical protein OsI_25188                             | EEC81650     | 261 | 24 | 56% | 57.60/5.98  | 3  |
| 92  | 2-phospho-D-glycerate hydroylase                           | AAN04181     | 109 | 9  | 28% | 46.20/5.16  | 3  |
| 93  | hypothetical protein OsI_25188                             | EEC81650     | 161 | 18 | 39% | 57.60/5.98  | 3  |
| 94  | enolase                                                    | AAC49173     | 116 | 15 | 34% | 48.30/5.42  | 4  |
| 95  | enolase                                                    | NP_001049556 | 179 | 20 | 58% | 48.29/5.32  | 4  |
| 96  | 2-phosphoglycerate dehydratase                             | Q42971       | 214 | 24 | 63% | 48.29/5.41  | 4  |
| 97  | UTP-glucose-1-phosphate uridylyltransferase                | NP_001063879 | 195 | 19 | 58% | 51.82/5.43  | 1  |
| 98  | F-type H <sup>+</sup> -transporting ATPase subunit $\beta$ | NP_001043900 | 230 | 20 | 49% | 59.60/6.1   | 4  |
| 99  | F-type H <sup>+</sup> -transporting ATPase subunit $\beta$ | NP_001056261 | 193 | 17 | 45% | 59.01/5.95  | 4  |
| 100 | F-type H <sup>+</sup> -transporting ATPase subunit $\beta$ | NP_001056261 | 212 | 18 | 50% | 59.01/5.95  | 4  |
| 101 | V-type H <sup>+</sup> -transporting ATPase subunit $\beta$ | NP_001057902 | 91  | 9  | 28% | 54.14/5.07  | 4  |
| 102 | hypothetical protein OsI_17385                             | EEC77995     | 95  | 12 | 24% | 54.50/6.44  | 1  |
| 103 | Cupin family protein                                       | ABF94466     | 78  | 14 | 13% | 74.70/6.02  | 2  |
| 104 | 6-phosphogluconate dehydrogenase                           | NP_001056586 | 77  | 21 | 42% | 52.97/5.85  | 1  |
| 105 | argininosuccinate synthase                                 | NP_001066459 | 66  | 11 | 21% | 52.50/6.59  | 1  |
| 106 | putative aminoacylase                                      | BAD10058     | 64  | 12 | 30% | 49.86/5.88  | 1  |
| 107 | argininosuccinate synthase                                 | NP_001066459 | 100 | 10 | 24% | 52.50/6.59  | 1  |
| 108 | argininosuccinate synthase                                 | NP_001066459 | 65  | 14 | 29% | 52.50/6.59  | 1  |
| 109 | OSJNBa0052P16.16                                           | CAD39715     | 64  | 6  | 20% | 48.00/6.64  | 12 |
| 110 | glucose-1-phosphate adenylyltransferase                    | NP_001051184 | 68  | 15 | 37% | 55.79/7.01  | 1  |
| 111 | Os05g0418000                                               | NP_001055566 | 64  | 9  | 28% | 50.07/5.44  | 12 |
| 112 | translation initiation factor 4A                           | NP_001045878 | 80  | 8  | 25% | 47.39/5.43  | 8  |

|     |                                                   |              |     |    |     |             |    |
|-----|---------------------------------------------------|--------------|-----|----|-----|-------------|----|
| 113 | hypothetical protein OsI_24355                    | EAZ02256     | 123 | 10 | 38% | 48.64/5.23  | 8  |
| 114 | amidase, hydantoinase/carbamoylase family protein | ABA99240     | 121 | 8  | 26% | 51.80/5.41  | 6  |
| 115 | eukaryotic initiation factor 4A                   | BAA02152     | 80  | 12 | 29% | 47.19/5.29  | 8  |
| 116 | glucose-1-phosphate adenylyltransferase           | NP_001062808 | 106 | 8  | 24% | 55.10/6.23  | 1  |
| 117 | TPA_exp: transposase                              | DAA02079     | 66  | 9  | 18% | 72.82/9.31  | 9  |
| 118 | Os10g0188500                                      | NP_001176052 | 146 | 4  | 34% | 21.14/4.81  | 12 |
| 119 | hypothetical protein OsI_27570                    | EEC82801     | 64  | 9  | 10% | 131.01/8.46 | 7  |
| 120 | hypothetical protein OsI_09330                    | EAY87910     | 86  | 16 | 38% | 47.04/4.94  | 3  |
| 121 | isocitrate dehydrogenase                          | NP_001043749 | 64  | 8  | 22% | 46.36/6.34  | 4  |
| 122 | alcohol dehydrogenase 1                           | ABA92030     | 64  | 10 | 22% | 38.14/6.19  | 2  |
| 123 | hypothetical protein OsI_18007                    | EEC78293     | 94  | 10 | 23% | 59.89/5.58  | 5  |
| 124 | L-idoitol 2-dehydrogenase                         | NP_001062412 | 70  | 9  | 33% | 39.99/6.03  | 4  |
| 125 | alcohol dehydrogenase 1                           | ABA92030     | 65  | 6  | 14% | 38.14/6.19  | 2  |
| 126 | L-idoitol 2-dehydrogenase                         | NP_001062412 | 98  | 16 | 55% | 39.99/6.03  | 1  |
| 127 | L-idoitol 3-dehydrogenase                         | NP_001062412 | 68  | 11 | 30% | 39.99/6.03  | 1  |
| 128 | L-idoitol 4-dehydrogenase                         | NP_001062412 | 113 | 17 | 55% | 39.99/6.03  | 1  |
| 129 | hypothetical protein OsJ_06802                    | EEE57026     | 90  | 5  | 25% | 34.307/8.1  | 3  |
| 130 | hypothetical protein OsI_05369                    | EAY77382     | 95  | 6  | 18% | 45.69/5.74  | 3  |
| 131 | tryptophanyl-tRNA synthetase                      | NP_001066951 | 83  | 13 | 37% | 46.53/5.62  | 9  |
| 132 | guanine nucleotide-exchange protein GEP2          | AAM00191     | 105 | 13 | 7%  | 199.20/5.49 | 7  |
| 133 | Os02g0158900                                      | NP_001045960 | 70  | 10 | 31% | 44.69/5.47  | 12 |
| 134 | Os04g0429200                                      | NP_001173940 | 85  | 5  | 31% | 15.49/6.89  | 12 |
| 135 | hypothetical protein OsJ_11020                    | EAZ27089     | 66  | 4  | 60% | 7.64/9.76   | 12 |
| 136 | OSJNBb0050003.16                                  | CAE01726     | 64  | 5  | 25% | 36.58/5.37  | 3  |
| 137 | monodehydroascorbate reductase                    | BAA77282     | 66  | 12 | 50% | 43.04/5.36  | 2  |
| 138 | actin                                             | NP_001065830 | 68  | 13 | 45% | 41.82/5.31  | 3  |
| 139 | actin                                             | NP_001054419 | 86  | 12 | 40% | 41.90/5.23  | 3  |
| 140 | retrotransposon protein                           | ABA95357     | 87  | 11 | 4%  | 319.63/8.44 | 1  |
| 141 | 3-isopropylmalate dehydrogenase                   | NP_001050807 | 85  | 10 | 29% | 41.37/5.3   | 1  |

|     |                                           |              |     |    |     |             |    |
|-----|-------------------------------------------|--------------|-----|----|-----|-------------|----|
| 142 | hypothetical protein OsI_13391            | EAY91751     | 64  | 5  | 30% | 14.96/9.58  | 12 |
| 143 | glyceraldehyde 3-phosphate dehydrogenase  | NP_001053139 | 65  | 14 | 48% | 36.92/6.34  | 4  |
| 144 | phosphoglycerate kinase                   | NP_001058317 | 64  | 9  | 31% | 42.31/6.19  | 5  |
| 145 | glyceraldehyde 3-phosphate dehydrogenase  | NP_001053139 | 129 | 11 | 39% | 36.92/6.34  | 1  |
| 146 | Os04g0338000                              | NP_001052494 | 80  | 11 | 33% | 38.50/6.03  | 1  |
| 147 | RGP2 protein                              | CAA09470     | 99  | 9  | 26% | 39.53/8.08  | 3  |
| 148 | aspartate aminotransferase                | NP_001048397 | 76  | 14 | 35% | 50.55/8.16  | 1  |
| 149 | L-idoitol 2-dehydrogenase                 | NP_001062412 | 93  | 11 | 29% | 39.99/6.03  | 1  |
| 150 | OrysaZxa                                  | Q75H81       | 219 | 19 | 54% | 42.11/5.75  | 12 |
| 151 | L-idoitol 2-dehydrogenase                 | NP_001062412 | 66  | 18 | 59% | 39.99/6.03  | 1  |
| 152 | elongation factor Tu                      | NP_001051912 | 83  | 18 | 44% | 48.56/6.04  | 8  |
| 153 | aspartate-semialdehyde dehydrogenase      | NP_001051347 | 111 | 8  | 32% | 40.44/6.73  | 1  |
| 154 | Os06g0215100                              | NP_001057134 | 70  | 7  | 29% | 43.7/9.51   | 12 |
| 155 | IAA-amino acid hydrolase                  | NP_001043347 | 138 | 13 | 41% | 47.28/5.66  | 1  |
| 156 | phosphoglycerate kinase                   | NP_001046020 | 69  | 14 | 47% | 42.20/5.64  | 5  |
| 157 | Os07g0120900                              | NP_001058784 | 66  | 8  | 20% | 58.43/8     | 12 |
| 158 | Os04g0386600                              | NP_001052622 | 72  | 14 | 47% | 41.64/5.66  | 1  |
| 159 | reversibly glycosylated polypeptide       | CAA77235     | 82  | 11 | 37% | 41.86/5.82  | 3  |
| 160 | succinyl-CoA synthetase $\beta$ subunit   | NP_001047463 | 119 | 8  | 21% | 45.41/5.98  | 4  |
| 161 | glucose-6-phosphate 1-epimerase           | NP_001054126 | 177 | 11 | 51% | 38.10/5.1   | 1  |
| 162 | Os03g0843300                              | NP_001051862 | 66  | 7  | 28% | 34.78/4.9   | 12 |
| 163 | hypothetical protein OsI_32784            | EAY77740     | 91  | 7  | 26% | 36.60/5.27  | 1  |
| 164 | Os03g0161100                              | NP_001049041 | 69  | 18 | 7%  | 317.24/4.96 | 7  |
| 165 | glucose and ribitol dehydrogenase homolog | Q75KH3       | 64  | 11 | 31% | 32.48/5.76  | 1  |
| 166 | enoyl-[acyl-carrier protein] reductase I  | NP_001061557 | 64  | 10 | 36% | 39.28/8.81  | 1  |
| 167 | malate dehydrogenase                      | NP_001064860 | 65  | 7  | 26% | 35.89/5.75  | 4  |
| 168 | malate dehydrogenase                      | NP_001064860 | 105 | 11 | 44% | 35.89/5.75  | 4  |
| 169 | Os05g0116000                              | NP_001054469 | 71  | 7  | 31% | 38.46/5.81  | 12 |
| 170 | Os02g0821001                              | NP_001173211 | 67  | 4  | 72% | 8.81/10.25  | 12 |

|     |                                                                      |              |     |    |     |            |    |
|-----|----------------------------------------------------------------------|--------------|-----|----|-----|------------|----|
| 171 | guanine nucleotide-binding protein subunit $\beta$ -2-like 1 protein | NP_001043910 | 77  | 6  | 27% | 36.67/5.97 | 7  |
| 172 | acyl-[acyl-carrier-protein] desaturase 2, chloroplastic              | Q8S059       | 66  | 14 | 39% | 45.08/6.39 | 1  |
| 173 | malate dehydrogenase                                                 | NP_001064860 | 65  | 8  | 33% | 35.89/5.75 | 4  |
| 174 | Os03g0793700                                                         | NP_001051533 | 67  | 13 | 31% | 52.44/6.78 | 2  |
| 175 | guanine nucleotide-binding protein subunit $\beta$ -2-like 1 protein | NP_001043910 | 65  | 6  | 31% | 36.67/5.97 | 7  |
| 176 | hypothetical protein OsJ_12925                                       | EAZ28885     | 110 | 9  | 23% | 49.98/7.74 | 2  |
| 177 | hypothetical protein OsJ_12925                                       | EAZ28885     | 76  | 7  | 21% | 49.98/7.74 | 2  |
| 178 | globulin-like protein                                                | AAM33459     | 64  | 9  | 18% | 52.38/6.78 | 2  |
| 179 | Os03g0793700                                                         | NP_001051533 | 64  | 15 | 35% | 52.44/6.78 | 2  |
| 180 | hypothetical protein OsJ_12925                                       | EAZ28885     | 66  | 10 | 26% | 49.98/7.74 | 2  |
| 181 | Os03g0327600                                                         | NP_001049995 | 64  | 10 | 39% | 39.25/6.3  | 12 |
| 182 | globulin-like protein                                                | AAM33459     | 66  | 7  | 23% | 52.38/6.78 | 2  |
| 183 | Os03g0327600                                                         | NP_001049995 | 72  | 10 | 39% | 39.25/6.3  | 12 |
| 184 | hypothetical protein OsJ_06082                                       | EEE56662     | 66  | 8  | 15% | 53.83/9.14 | 6  |
| 185 | Os01g0762500                                                         | NP_001044328 | 66  | 7  | 24% | 56.78/9.09 | 6  |
| 186 | Os03g0793700                                                         | NP_001051533 | 88  | 9  | 28% | 52.47/6.78 | 2  |
| 187 | Os11g0701100                                                         | NP_001068520 | 76  | 9  | 29% | 31.86/6.12 | 1  |
| 188 | translation initiation factor 3 subunit I                            | NP_001061508 | 121 | 8  | 26% | 36.53/5.94 | 8  |
| 189 | metal-dependent hydrolase-like protein                               | BAD15421     | 71  | 8  | 30% | 29.60/6.19 | 1  |
| 190 | receptor protein kinase-like                                         | BAD73679     | 86  | 7  | 16% | 70.30/7.1  | 5  |
| 191 | hypothetical protein OsI_07904                                       | EEC73520     | 69  | 10 | 16% | 81.34/9.36 | 12 |
| 192 | Os03g0663800                                                         | NP_001173574 | 96  | 10 | 35% | 45.51/6.07 | 2  |
| 193 | Os03g0663800                                                         | NP_001173574 | 66  | 10 | 35% | 45.51/6.07 | 2  |
| 194 | Os03g0663800                                                         | NP_001173574 | 161 | 9  | 30% | 45.51/6.07 | 2  |
| 195 | unknown protein                                                      | AAN05517     | 107 | 7  | 41% | 35.44/5.57 | 12 |
| 196 | Os03g0663800                                                         | NP_001173574 | 67  | 10 | 35% | 45.51/6.07 | 2  |
| 197 | Os03g0663800                                                         | NP_001173574 | 72  | 10 | 35% | 45.51/6.07 | 2  |
| 198 | lactoylglutathione lyase                                             | NP_001061172 | 64  | 9  | 39% | 32.88/5.51 | 1  |
| 199 | Os03g0663800                                                         | NP_001173574 | 103 | 8  | 31% | 45.51/6.07 | 2  |

|     |                                          |              |     |    |     |             |    |
|-----|------------------------------------------|--------------|-----|----|-----|-------------|----|
| 200 | enoyl-[acyl-carrier protein] reductase I | NP_001061557 | 73  | 9  | 34% | 39.28/8.81  | 1  |
| 201 | unnamed protein product                  | BAH00330     | 65  | 5  | 44% | 20.73/6.18  | 1  |
| 202 | hypothetical protein OsJ_13801           | EAZ29742     | 67  | 12 | 37% | 54.48/9.06  | 2  |
| 203 | putative glucanase                       | BAB85436     | 181 | 12 | 42% | 34.23/5.35  | 4  |
| 204 | lactoylglutathione lyase                 | NP_001061172 | 83  | 12 | 46% | 32.88/5.51  | 1  |
| 205 | hypothetical protein                     | AAT44171     | 182 | 6  | 52% | 16.21/10.35 | 12 |
| 206 | hypothetical protein OsI_11164           | EEC75053     | 134 | 5  | 33% | 31.78/5.11  | 1  |
| 207 | hypothetical protein OsI_11164           | EEC75053     | 81  | 9  | 31% | 31.78/5.11  | 1  |
| 208 | $\alpha$ -soluble NSF attachment protein | NP_001061446 | 64  | 5  | 20% | 32.75/5.04  | 3  |
| 209 | Os06g0341300                             | NP_001057565 | 64  | 10 | 48% | 27.91/4.19  | 12 |
| 210 | Os12g0626500                             | NP_001067326 | 156 | 8  | 41% | 19.89/4.57  | 12 |
| 211 | Os03g0663800                             | NP_001173574 | 120 | 9  | 33% | 45.51/6.07  | 2  |
| 212 | Os02g0580300                             | NP_001047234 | 68  | 14 | 54% | 29.85/4.71  | 3  |
| 213 | 14-3-3-like protein gf14-6               | ABR25721     | 87  | 5  | 58% | 16.42/4.57  | 3  |
| 214 | Os04g0462500                             | NP_001053003 | 64  | 8  | 37% | 29.96/4.76  | 3  |
| 215 | Os08g0430500                             | NP_001061856 | 118 | 5  | 30% | 28.98/4.78  | 3  |
| 216 | Os11g0546900                             | NP_001068067 | 109 | 13 | 56% | 29.36/4.83  | 3  |
| 217 | Os08g0480800                             | NP_001062060 | 68  | 13 | 48% | 29.10/4.85  | 3  |
| 218 | Os04g0404400                             | NP_001052704 | 219 | 12 | 48% | 31.33/4.9   | 12 |
| 219 | hypothetical protein                     | BAD16983     | 161 | 4  | 72% | 10.94/8.53  | 12 |
| 220 | OSJNBb0014D23.1                          | CAE05267     | 154 | 6  | 12% | 74.92/5.76  | 12 |
| 221 | Os03g0663800                             | NP_001173574 | 75  | 9  | 33% | 45.51/6.07  | 2  |
| 222 | hydroxyacylglutathione hydrolase         | NP_001050016 | 71  | 9  | 46% | 29.00/5.43  | 1  |
| 223 | inorganic pyrophosphatase                | NP_001054331 | 150 | 10 | 50% | 24.29/5.59  | 1  |
| 224 | Os07g0170200                             | NP_001058990 | 75  | 6  | 21% | 31.09/9.6   | 7  |
| 225 | Os05g0569500                             | NP_001056364 | 124 | 10 | 35% | 26.74/5.58  | 12 |
| 226 | Cupin family protein, expressed          | ABF95817     | 103 | 13 | 26% | 61.74/7.18  | 2  |
| 227 | hypothetical protein OsJ_12925           | EAZ28885     | 68  | 7  | 19% | 49.98/7.74  | 2  |
| 228 | globulin-like protein                    | AAM33459     | 120 | 9  | 21% | 52.38/6.78  | 2  |



|     |                                                       |              |     |    |     |             |    |
|-----|-------------------------------------------------------|--------------|-----|----|-----|-------------|----|
| 229 | hypothetical protein OsJ_25289                        | EEE67666     | 80  | 10 | 7%  | 213.77/4.93 | 12 |
| 230 | hypothetical protein OsJ_19146                        | EEE64309     | 65  | 7  | 21% | 30.55/6.66  | 1  |
| 231 | Cupin family protein                                  | ABF95817     | 87  | 15 | 30% | 61.74/7.18  | 2  |
| 232 | hypothetical protein                                  | BAD81742     | 99  | 5  | 46% | 18.85/9.00  | 12 |
| 233 | thioredoxin peroxidase A                              | P0C5C8       | 89  | 6  | 31% | 24.23/5.97  | 1  |
| 234 | hypothetical protein OsI_26825                        | EAZ04671     | 67  | 5  | 40% | 23.72/5.78  | 2  |
| 235 | protein of unknown function DUF1264 family protein    | NP_001044131 | 66  | 13 | 60% | 27.72/5.98  | 3  |
| 236 | retrotransposon protein, putative, Ty3-gypsy subclass | ABB47110     | 103 | 10 | 10% | 151.89/7.91 | 7  |
| 237 | Os03g0277500                                          | NP_001049720 | 65  | 8  | 66% | 15.05/5.54  | 12 |
| 238 | thioredoxin 1                                         | NP_001051587 | 119 | 7  | 52% | 14.90/5.67  | 3  |
| 239 | 20S proteasome subunit $\beta$ 6                      | NP_001063603 | 141 | 8  | 39% | 24.61/6.43  | 3  |
| 240 | Os03g0822200                                          | NP_001051733 | 82  | 11 | 52% | 27.95/6.34  | 1  |
| 241 | Os11g0701100                                          | NP_001068520 | 73  | 8  | 30% | 31.86/6.12  | 1  |
| 242 | Cupin family protein                                  | ABF95817     | 70  | 10 | 21% | 61.74/7.18  | 2  |
| 243 | Os03g0659300                                          | NP_001050818 | 94  | 5  | 50% | 15.17/5.48  | 1  |
| 244 | Os05g0116100                                          | NP_001054470 | 67  | 7  | 46% | 23.73/5.81  | 3  |
| 245 | Os05g0542500                                          | NP_001056195 | 66  | 10 | 36% | 20.50/5.89  | 3  |
| 246 | unnamed protein product                               | AAA72362     | 66  | 10 | 36% | 20.26/6.6   | 12 |
| 247 | unnamed protein product                               | AAA72362     | 65  | 10 | 35% | 20.26/6.6   | 12 |
| 248 | unnamed protein product                               | AAA72362     | 109 | 12 | 38% | 20.26/6.6   | 12 |
| 249 | Os09g0467200                                          | NP_001063423 | 128 | 10 | 39% | 25.34/5.5   | 3  |
| 250 | triosephosphate isomerase (TIM)                       | NP_001042016 | 116 | 8  | 62% | 27.27/5.38  | 4  |
| 251 | 20S proteasome subunit $\alpha$ 2                     | NP_001047516 | 112 | 10 | 48% | 25.83/5.39  | 3  |
| 252 | unnamed protein product                               | AAA72362     | 75  | 9  | 28% | 20.26/6.6   | 12 |
| 253 | hypothetical protein                                  | BAD62040     | 92  | 4  | 46% | 8.49/4.75   | 12 |
| 254 | triosephosphate isomerase (TIM)                       | NP_001042016 | 66  | 7  | 35% | 27.27/5.38  | 4  |
| 256 | triosephosphate isomerase (TIM)                       | NP_001042016 | 105 | 8  | 44% | 27.27/5.38  | 4  |
| 255 | unknown protein                                       | BAD53921     | 67  | 11 | 17% | 70.92/8.08  | 12 |
| 257 | triosephosphate isomerase (TIM)                       | NP_001063777 | 118 | 13 | 43% | 32.715/6.96 | 4  |

|     |                                    |              |     |    |     |             |    |
|-----|------------------------------------|--------------|-----|----|-----|-------------|----|
| 258 | putative chaperonin 21 precursor   | BAD35232     | 64  | 13 | 69% | 23.20/5.72  | 3  |
| 259 | hypothetical protein               | BAD19892     | 102 | 3  | 76% | 7.02/9.4    | 12 |
| 260 | glutathione S-transferase          | NP_001059595 | 82  | 9  | 42% | 26.04/5.01  | 1  |
| 261 | Os03g0197300                       | NP_001049271 | 106 | 7  | 21% | 68.53/5.52  | 2  |
| 262 | Os03g0197300                       | NP_001049271 | 146 | 8  | 21% | 68.53/5.52  | 2  |
| 263 | Os03g0197300                       | NP_001049271 | 86  | 8  | 19% | 68.53/5.52  | 2  |
| 264 | Os03g0197300                       | NP_001049271 | 67  | 8  | 18% | 68.53/5.52  | 2  |
| 265 | Os01g0210500                       | NP_001042368 | 116 | 5  | 34% | 23.75/4.73  | 3  |
| 266 | hypothetical protein               | BAD87149     | 111 | 4  | 47% | 12.71/11.12 | 12 |
| 267 | Os03g0197300                       | NP_001049271 | 175 | 6  | 18% | 68.53/5.52  | 2  |
| 268 | Os03g0197300                       | NP_001049271 | 67  | 6  | 18% | 68.53/5.52  | 2  |
| 269 | hypothetical protein OsI_19379     | EEC78937     | 94  | 7  | 21% | 53.68/5.55  | 1  |
| 270 | hypothetical protein OsI_28286     | EAZ06044     | 89  | 11 | 20% | 38.65/5.85  | 3  |
| 271 | Os05g0468800                       | NP_001055802 | 103 | 8  | 47% | 18.23/5.71  | 1  |
| 272 | Os10g0437500                       | NP_001064677 | 98  | 5  | 25% | 19.16/5.61  | 12 |
| 273 | Os08g0129200                       | NP_001060914 | 64  | 5  | 47% | 19.02/6.28  | 3  |
| 274 | Os03g0305600                       | NP_001049884 | 97  | 9  | 54% | 18.42/6.42  | 2  |
| 275 | Os07g0191700                       | NP_001059096 | 64  | 8  | 8%  | 129.06/8.84 | 12 |
| 276 | $\alpha$ -amylase inhibitor        | ACV41264     | 65  | 5  | 35% | 15.89/6.51  | 2  |
| 277 | hypothetical protein OsI_09038     | EEC74046     | 147 | 6  | 21% | 42.96/8.85  | 9  |
| 278 | hypothetical protein OsI_01558     | EEC70487     | 124 | 5  | 36% | 17.91/6.41  | 12 |
| 279 | hypothetical protein OsI_08519     | EEC73809     | 79  | 6  | 22% | 44.51/4.94  | 12 |
| 280 | hypothetical protein OsJ_05706     | EEE56482     | 80  | 11 | 15% | 90.63/8.69  | 12 |
| 281 | hypothetical protein OsI_11558     | EEC75250     | 104 | 8  | 19% | 55.96/5.48  | 1  |
| 282 | hypothetical protein OsJ_33343     | EEE51843     | 92  | 8  | 19% | 61.38/6.98  | 5  |
| 283 | regulator of ribonuclease activity | ABR25651     | 65  | 8  | 64% | 18.28/5.61  | 9  |
| 284 | Os01g0184100                       | NP_001042231 | 81  | 6  | 40% | 18.13/5.61  | 2  |
| 285 | Os01g0722800                       | NP_001044103 | 69  | 5  | 36% | 18.34/5.35  | 12 |
| 286 | Os05g0157200                       | NP_001054704 | 69  | 8  | 45% | 18.16/5.22  | 2  |

|     |                                     |              |    |    |     |             |    |
|-----|-------------------------------------|--------------|----|----|-----|-------------|----|
| 287 | hypothetical protein OsI_35528      | EAY80356     | 64 | 5  | 56% | 19.19/6.36  | 12 |
| 288 | Os01g0225600                        | NP_001042461 | 88 | 6  | 52% | 16.29/5     | 2  |
| 289 | Os06g0363701                        | NP_001174783 | 64 | 10 | 11% | 152.05/5.3  | 12 |
| 290 | hypothetical protein OsI_19752      | EEC79115     | 64 | 4  | 41% | 17.41/6.49  | 1  |
| 291 | hypothetical protein OsJ_13801      | EAZ29742     | 70 | 7  | 20% | 54.48/9.06  | 2  |
| 292 | retrotransposon protein             | ABA95630     | 68 | 6  | 27% | 36.39/6.27  | 9  |
| 293 | hypothetical protein OsI_21855      | EEC80108     | 67 | 4  | 13% | 15.02/5.85  | 1  |
| 294 | hypothetical protein OsJ_09934      | EEE58599     | 66 | 4  | 58% | 11.23/10.32 | 12 |
| 295 | hypothetical protein OsJ_30719      | EEE50570     | 65 | 4  | 38% | 15.26/5.08  | 1  |
| 296 | OSJNBa0009K15.7                     | CAE05087     | 90 | 11 | 8%  | 195.33/8.62 | 11 |
| 297 | hypothetical protein                | AAL84309     | 64 | 7  | 22% | 35.02/6.51  | 11 |
| 298 | hypothetical protein                | BAD05367     | 64 | 4  | 34% | 12.67/7.85  | 12 |
| 299 | Os06g0221300                        | NP_001057177 | 65 | 6  | 32% | 18.45/6.18  | 3  |
| 300 | transposon protein                  | AAK52138     | 68 | 7  | 35% | 23.00/11.05 | 9  |
| 301 | putative gypsy-type retrotransposon | AAL58269     | 74 | 8  | 7%  | 165.47/9.53 | 7  |
| 302 | cofilin                             | NP_001051721 | 64 | 6  | 56% | 16.05/5.72  | 3  |

<sup>a</sup> Number of matched peptides.

<sup>b</sup> Sequence coverage.

<sup>c</sup> Functional categories of the proteins. The numbers indicate the protein function category: 1 - Metabolism, 2 - Disease/defense, 3 - Cell structure, 4 - Energy, 5 - Signal transduction, 6 - Protein destination and storage, 7 - Cell growth/division, 8 - Protein synthesis, 9 - Transcription, 10 - Transporters, 11 - Intracellular traffic and 12 - Unknown protein.
