# Supplementary material
Source: PubMed Central journal article supplement (PMC3615530)
Supplement: gmb-36-87-s002.pdf [file gmb-36-87-s002.pdf]

**Table S2 - The unknown proteins identified by MALDI-TOF-MS.**

| Protein no. | Protein name                   | Accession no. | MOWSE score | NMP <sup>a</sup> | SC <sup>b</sup> | Theoretical Mr (kDa) and pI | Function        |
|-------------|--------------------------------|---------------|-------------|------------------|-----------------|-----------------------------|-----------------|
| 15          | hypothetical protein           | BAD61634      | 65          | 5                | 36%             | 15.63/9.99                  | 12 <sup>c</sup> |
| 18          | hypothetical protein OsJ_11969 | EEE59627      | 65          | 4                | 26%             | 13.99/4.99                  | 12              |
| 19          | hypothetical protein           | BAD20105      | 64          | 7                | 31%             | 30.32/11.81                 | 12              |
| 49          | Os02g0250600                   | NP_001046445  | 64          | 9                | 22%             | 47.34/6.4                   | 12              |
| 109         | OSJNBa0052P16.16               | CAD39715      | 64          | 6                | 20%             | 48.00/6.64                  | 12              |
| 111         | Os05g0418000                   | NP_001055566  | 64          | 9                | 28%             | 50.07/5.44                  | 12              |
| 118         | Os10g0188500                   | NP_001176052  | 146         | 4                | 34%             | 21.14/4.81                  | 12              |
| 133         | Os02g0158900                   | NP_001045960  | 70          | 10               | 31%             | 44.69/5.47                  | 12              |
| 134         | Os04g0429200                   | NP_001173940  | 85          | 5                | 31%             | 15.49/6.89                  | 12              |
| 135         | hypothetical protein OsJ_11020 | EAZ27089      | 66          | 4                | 60%             | 7.64/9.76                   | 12              |
| 142         | hypothetical protein OsL_13391 | EAY91751      | 64          | 5                | 30%             | 14.96/9.58                  | 12              |
| 150         | OrysaZxa                       | Q75H81        | 219         | 19               | 54%             | 42.11/5.75                  | 12              |
| 154         | Os06g0215100                   | NP_001057134  | 70          | 7                | 29%             | 43.87/9.51                  | 12              |
| 157         | Os07g0120900                   | NP_001058784  | 66          | 8                | 20%             | 58.43/8                     | 12              |
| 162         | Os03g0843300                   | NP_001051862  | 66          | 7                | 28%             | 34.78/4.9                   | 12              |
| 169         | Os05g0116000                   | NP_001054469  | 71          | 7                | 31%             | 38.46/5.81                  | 12              |
| 170         | Os02g0821001                   | NP_001173211  | 67          | 4                | 72%             | 8.81/10.25                  | 12              |
| 181         | Os03g0327600                   | NP_001049995  | 64          | 10               | 39%             | 39.25/6.3                   | 12              |
| 183         | Os03g0327600                   | NP_001049995  | 72          | 10               | 39%             | 39.25/6.3                   | 12              |
| 191         | hypothetical protein OsI_07904 | EEC73520      | 69          | 10               | 16%             | 81.34/9.36                  | 12              |
| 195         | unknown protein                | AAN05517      | 107         | 7                | 41%             | 35.44/5.57                  | 12              |
| 205         | hypothetical protein           | AAT44171      | 182         | 6                | 52%             | 16.21/10.35                 | 12              |
| 209         | Os06g0341300                   | NP_001057565  | 64          | 10               | 48%             | 27.91/4.19                  | 12              |
| 210         | Os12g0626500                   | NP_001067326  | 156         | 8                | 41%             | 19.87/4.57                  | 12              |

|     |                                |              |     |    |     |             |    |
|-----|--------------------------------|--------------|-----|----|-----|-------------|----|
| 218 | Os04g0404400                   | NP_001052704 | 219 | 12 | 48% | 31.33/4.9   | 12 |
| 219 | hypothetical protein           | BAD16983     | 161 | 4  | 72% | 10.94/8.53  | 12 |
| 220 | OSJNBb0014D23.1                | CAE05267     | 154 | 6  | 12% | 74.92/5.76  | 12 |
| 225 | Os05g0569500                   | NP_001056364 | 124 | 10 | 35% | 26.74/5.58  | 12 |
| 229 | hypothetical protein OsJ_25289 | EEE67666     | 80  | 10 | 7%  | 213.77/4.93 | 12 |
| 232 | hypothetical protein           | BAD81742     | 99  | 5  | 46% | 18.85/9     | 12 |
| 237 | Os03g0277500                   | NP_001049720 | 65  | 8  | 66% | 15.05/5.54  | 12 |
| 246 | unknown protein                | AAA72362     | 66  | 10 | 36% | 20.26/6.6   | 12 |
| 247 | unknown protein                | AAA72362     | 65  | 10 | 35% | 20.26/6.6   | 12 |
| 248 | unknown protein                | AAA72362     | 109 | 12 | 38% | 20.26/6.6   | 12 |
| 252 | unknown protein                | AAA72362     | 75  | 9  | 28% | 20.26/6.6   | 12 |
| 253 | hypothetical protein           | BAD62040     | 92  | 4  | 46% | 8.49/4.75   | 12 |
| 255 | unknown protein                | BAD53921     | 67  | 11 | 17% | 70.92/8.08  | 12 |
| 259 | hypothetical protein           | BAD19892     | 102 | 3  | 76% | 7.02/9.4    | 12 |
| 266 | hypothetical protein           | BAD87149     | 111 | 4  | 47% | 12.71/11.12 | 12 |
| 272 | Os10g0437500                   | NP_001064677 | 98  | 5  | 25% | 19.16/5.61  | 12 |
| 275 | Os07g0191700                   | NP_001059096 | 64  | 8  | 8%  | 129.06/8.84 | 12 |
| 278 | hypothetical protein OsI_01558 | EEC70487     | 124 | 5  | 36% | 17.91/6.41  | 12 |
| 279 | hypothetical protein OsI_08519 | EEC73809     | 79  | 6  | 22% | 44.51/4.94  | 12 |
| 280 | hypothetical protein OsJ_05706 | EEE56482     | 80  | 11 | 15% | 90.63/8.69  | 12 |
| 285 | Os01g0722800                   | NP_001044103 | 69  | 5  | 36% | 18.34/5.35  | 12 |
| 287 | hypothetical protein OsI_35528 | EAY80356     | 64  | 5  | 56% | 19.19/6.36  | 12 |
| 289 | Os06g0363701                   | NP_001174783 | 64  | 10 | 11% | 152.05/5.3  | 12 |
| 294 | hypothetical protein OsJ_09934 | EEE58599     | 66  | 4  | 58% | 11.23/10.32 | 12 |
| 298 | hypothetical protein           | BAD05367     | 64  | 4  | 34% | 12.67/7.85  | 12 |

<sup>a</sup> Number of matched peptides.

<sup>b</sup> Sequence coverage.

<sup>c</sup> 12: Unknown proteins.
